# Supplementary material
Source: PubMed Central journal article supplement (PMC6755722)
Supplement: JB.00374-19-s0001.pdf [file JB.00374-19-s0001.pdf]

Supplement to:

The Cyclopropane Fatty Acid Synthase Mediates Antibiotic Resistance and Gastric Colonization of *Helicobacter pylori*

Xueqing Jiang<sup>a\*</sup>, Yuanyuan Duan<sup>b\*</sup>, Boshen Zhou<sup>a</sup>, Qiaoqiao Guo<sup>c</sup>, Haihong Wang<sup>c</sup>, Xudong Hang<sup>a</sup>, Liping Zeng<sup>a</sup>, Jia Jia<sup>a</sup>, Hongkai Bi<sup>a,d#</sup>

<sup>a</sup>Department of Pathogen Biology, Jiangsu Key Laboratory of Pathogen Biology, Nanjing Medical University, Nanjing, Jiangsu, China

<sup>b</sup>The Laboratory Center for Basic Medical Sciences, Nanjing Medical University, Nanjing, Jiangsu, China

<sup>c</sup>Guangdong Provincial Key Laboratory of Protein Function and Regulation in Agricultural Organisms, College of Life Sciences, South China Agricultural University, Guangzhou, Guangdong, China.

<sup>d</sup>Department of Gastroenterology, Sir Run Run Hospital, Nanjing Medical University, Nanjing, Jiangsu, China.

\*These authors contributed equally to this work.

Table S1. Oligonucleotide primers used in this study

| Code | Oligonucleotides    | Oligonucleotides Sequence        |
|------|---------------------|----------------------------------|
| P1   | aphAL-PstI          | ATAAACTGCAGGCGAACCATTTGAGGTGATAG |
| P2   | aphAR-BamHI         | CGCGCGGATCCTTAAACAATTCATCCAGTA   |
| P3   | CfaS-EcoRI-mut1     | AATTGAATTCACTCTCACAGCTCACGCAA    |
| P4   | CfaS-PstI-mut2      | TATACTGCAGTGTCTATTCCTTGA ACTCT   |
| P5   | CfaS-BamHI-mut5     | AATTGGATCCGATTTTAGCCCCTTCTTTCA   |
| P6   | CfaS-XbaI-mut6      | AATATCTAGATTGTCCGTGCCTAATTCAGA   |
| P7   | HPCfaS-XhoI-L       | TATACTCGAGTGTCCGCTTTAGAGATCG     |
| P8   | HPCfaS-PstI-R       | GTGACTGCAGTTATTGGTAGATGTATTCTTTG |
| P9   | pBS0203Cm04-KpnI-1  | AATTGGTACCGGTTTAGAAGCGCAAAGT     |
| P10  | pBS0203Cm04-XhoI-2  | GTCACTCGAGGCTGTTAATACTAATCCAA    |
| P11  | pBS0203Cm04-BamHI-3 | AGATGGATCCAAGCCAATTCTTCCAATGA    |
| P12  | pBS0203Cm04-XbaI-4  | AATTTCTAGAATGAGCCGGTGGTGATCA     |
| P13  | CatGC-PstI-L        | CTGACTGCAGGATCCGCCATATTGTGTTGA   |
| P14  | CatGC-BamHI-R       | ATATGGATCCCGCAGAACTGGTAGGTATGGA  |
| P15  | pHel3 HPcfa-XhoI-L  | TATACTCGAGGGCCAATATGAGGGATGT     |
| P16  | pHel3 HPcfa-KpnI-R  | GCGCGGTACCTTATTGGTAGATGTATTCT    |
| P17  | HPCfaS-NdeI-L       | ACGTGCATATGATTTCAAATTTTTGCTCA    |
| P18  | HPCfaS-SallI-R      | TCTTGTCGACTTATTGGTAGATGTATTCTT   |
| P19  | EcMtn-NdeI-L        | GACGTCATATGAAAATCG GCATCATTG     |
| P20  | EcMtn-SallI-R       | TCAAGTCGACTTAGCCATGTGCAAGTT      |
| P21  | BsLuxS-KpnI-L       | ACGTAGGTACCATGCCTTCAGTAGAAAGT    |
| P22  | BsLuxS-SallI-R      | TCTTGTCGACTTAGCCAATACTTTTAGC     |

The underlined italic sequences are the introduced restriction sites.

Table S2. Fatty acid composition of *H. pylori* strain 26695 and its  $\Delta cfaS$  mutant derivatives.

| Fatty acid <sup>a</sup> | 26695 | HpS42<br>( $\Delta cfaS$ ) | 26995<br>+Dioc(50 $\mu$ M) <sup>b</sup> | HpS43<br>( $\Delta cfaS:: cfaS$ ) |
|-------------------------|-------|----------------------------|-----------------------------------------|-----------------------------------|
| C14:0                   | 36    | 17                         | 18                                      | 33                                |
| C16:0                   | 11    | 24                         | 25                                      | 12                                |
| C18:0                   | 12    | 25                         | 26                                      | 13                                |
| C18:1                   | 8     | 31                         | 24                                      | 9                                 |
| cycC19:0                | 28    | ND                         | 4                                       | 29                                |

<sup>a</sup>The fatty acids listed are those positively assigned by gas chromatographic data and with an abundance of greater than 1% in at least one sample. The data presented represent the mean of results from three independent experiments. cyc, cyclopropane ring; ND, not detected.

<sup>b</sup>Strain 26695 was cultured in the presence of 50  $\mu$ M dioctylamine.

Table S3. Generation times of *H. pylori* strains

| Strain                              | Generation time (h) <sup>a</sup> |
|-------------------------------------|----------------------------------|
| 26695                               | 4.0±0.5                          |
| HpS42 ( $\Delta cfaS$ )             | 6.7±0.8                          |
| 26995+Dioc(10 $\mu$ M) <sup>b</sup> | 5.0±0.3                          |
| 26995+Dioc(50 $\mu$ M) <sup>b</sup> | 6.6±0.2                          |
| HpS43 ( $\Delta cfaS::cfaS$ )       | 4.0±0.6                          |
| HpS48                               | 3.9±0.5                          |
| HpS48+Dioc(50 $\mu$ M) <sup>b</sup> | 6.4±1.0                          |
| HpS49                               | 4.3±0.8                          |
| HpS49+Dioc(50 $\mu$ M) <sup>b</sup> | 4.7±0.5                          |

<sup>a</sup>The data presented represent the mean of results from three independent experiments.

<sup>b</sup>The strains were cultured in the presence of 10  $\mu$ M or 50  $\mu$ M dioctylamine.

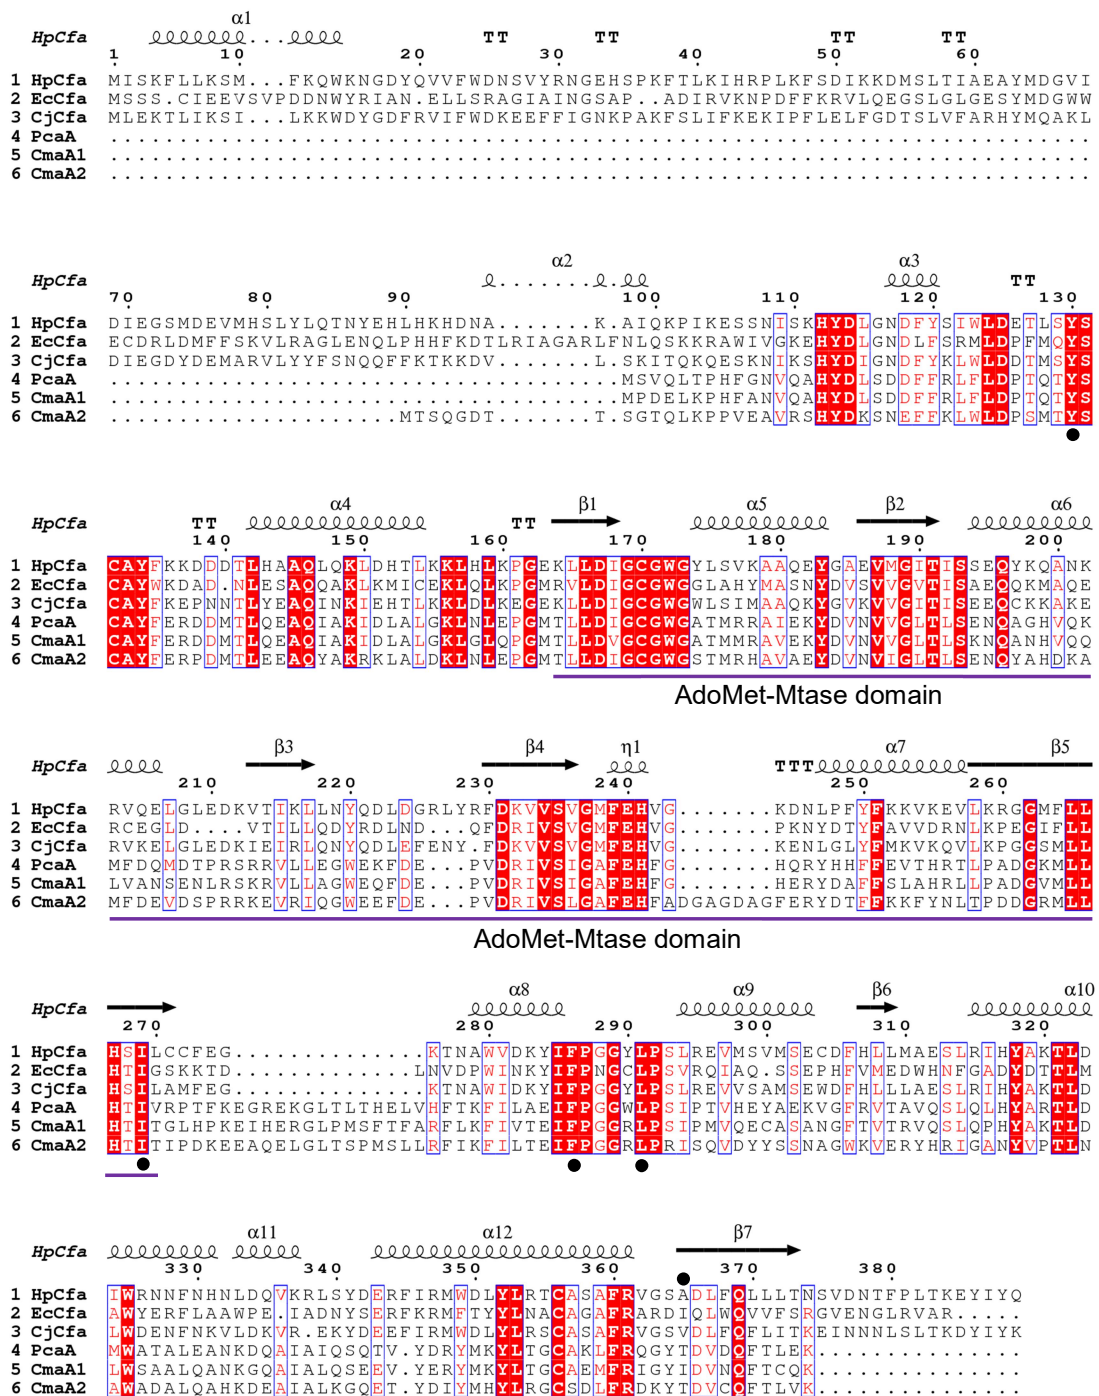

Fig S1. Multiple protein sequence alignments of CfaS homologues. The predicted protein sequence of HpCfaS (WP\_000623798) is compared with the protein sequences of *E. coli* CfaS (WP\_000098896), *Campylobacter jejuni* CfaS (WP\_002892711), PcaA (WP\_003402323), CmaA1 (WP\_003900041) and CmaA2 (WP\_003402621) from *M. tuberculosis*. The secondary structure diagrammed at the top is that of HpCfaS. Identical residues are in white letters with red background, similar residues are in red letters with white background, varied residues are in black letters, and dots represent gaps.  $\alpha$ :  $\alpha$ -helix;  $\beta$ :  $\beta$ -sheet; T:  $\beta$ -turns/coils. The AdoMet-MTase domains are indicated by an underline. The solid circles denote the dioctylamine-interacting amino acid residues.

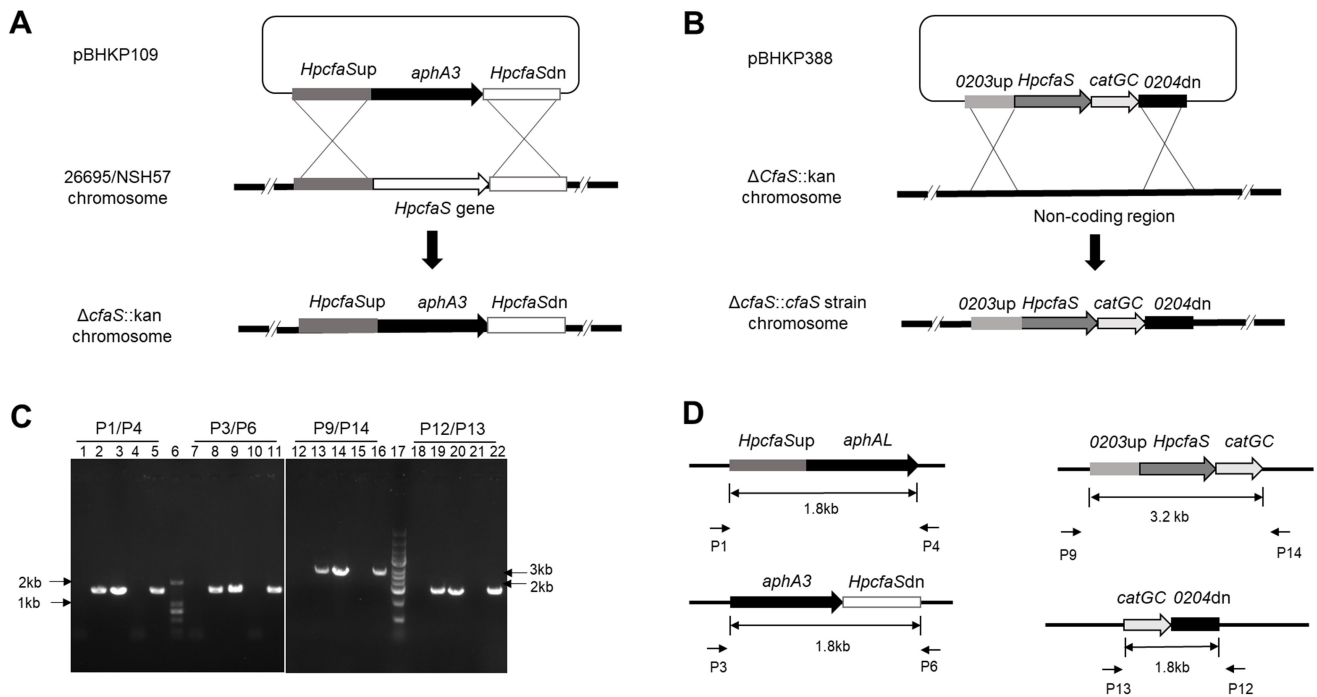

Fig S2. Construction and PCR confirmation of the  $\Delta cfaS$  and  $\Delta cfaS::cfaS$  strains.

(A) Recombination events required to generate the  $\Delta cfaS$  mutant strain using the *aphAL* cassette to displace *HpcfaS* gene in the wild type strain by natural transformation. (B) Recombination events required to generate the  $\Delta cfaS::cfaS$  strain using chromosomal complementation system by natural transformation. (C) and (D). PCR confirmation of the mutant and complementation strains. As shown in D, expected product size using the primer pair P1/P4 and P3/P6 for mutant confirmation is ~1.8 kb, while the expected product size using the primer pair P9/P14 and P13/P12 for complementation confirmation is ~3.2 kb and 1.8 kb, respectively. From left to right, the templates (lane 1-5 and lane 7-11) used in the PCR reactions are the genomic DNAs of the strain 26695, 26695  $\Delta cfaS$ , Hp159  $\Delta cfaS$ , Hp159 and the plasmid DNA of pBHKP203, respectively, while the templates (lane 12-16 and lane 18-22) are the genomic DNAs of the strain 26695  $\Delta cfaS$ , 26695  $\Delta cfaS::cfaS$ , Hp159  $\Delta cfaS::cfaS$ , Hp159  $\Delta cfaS$  and the plasmid DNA of pBHKP388, respectively.

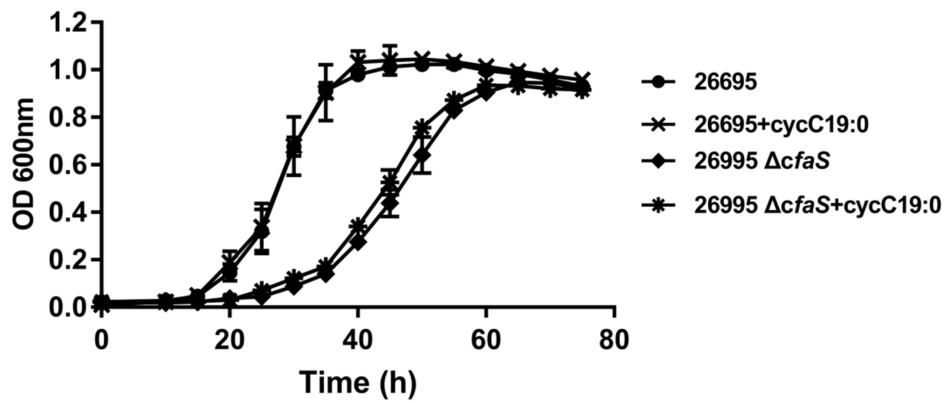

Fig S3. Growth curves of the *H. pylori* 26695 and  $\Delta cfaS$  strains on BHI broths containing FCS supplemented with or without cycC19:0 (0.01%) at 37°C. At the indicated time points, data represented as OD<sub>600</sub> measurements. The data are the means with standard error bars from three independent determinations.

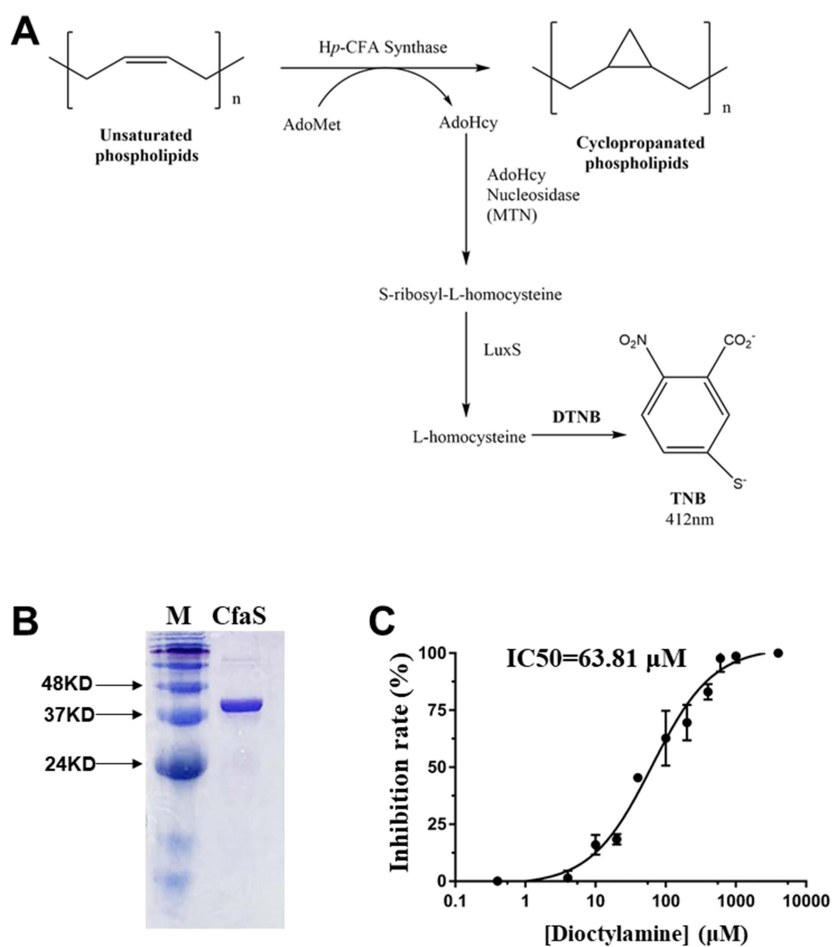

Fig S4. Dioctylamine inhibits HpCfaS methyltransferase activity. (A) Coupled Assay for HpCfaS Methyltransferase Activity. In this method, SAH, the product of cyclopropane mycolic acid synthases, is converted to homocysteine by the highly efficient SahH which can react readily with Ellman's reagent (DTNB) resulting in absorbance at 412 nm. (B) SDS-PAGE analysis of the purified HpCfaS. The apparent molecular weight of His-tagged RpfB is about 46 kDa. (C) Dose-response curve of dioctylamine inhibition of HpCfaS as measured in a coupled colorimetric assay. Values are plotted for percent inhibition relative to DMSO control. Concentration of HpCfaS used was 0.5 μM.



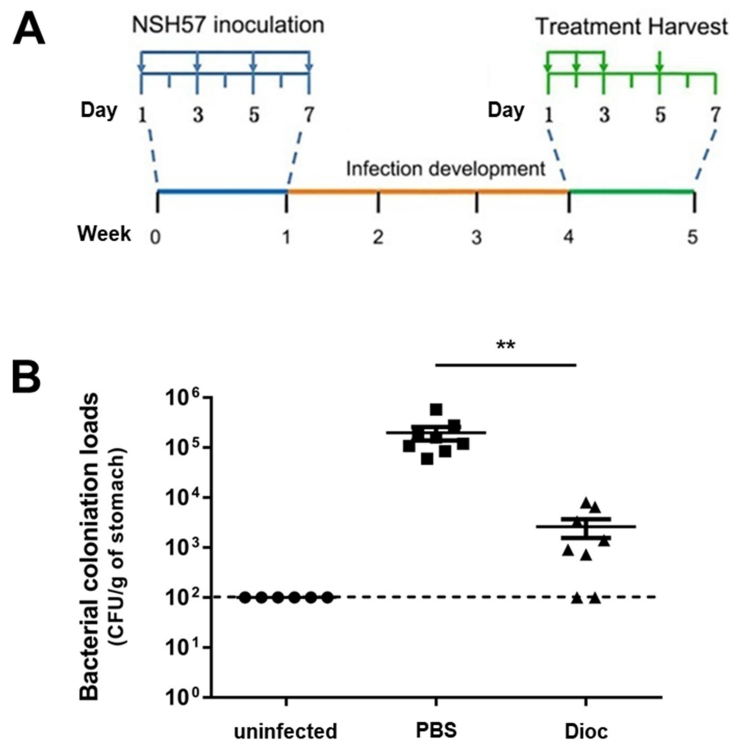

Fig S5. Anti-*H. pylori* efficacy *in vivo*. (A) The study protocol including *H. pylori* inoculation and infection development in C57BL/6 mice, followed by the treatments. (B) Quantification of bacterial burden in the stomach of *H. pylori*-infected mice treated with PBS or Diocetylamine. Error bars represent the SD derived from 6 mice (uninfected), 8 mice (PBS) or 8 mice (Dioc) per group. If no colonies were present, calculations were made using the limit of detection (100 CFU/g stomach). \*\* $P < 0.01$ .
